# Supplementary material
Source: PubMed Central journal article supplement (PMC4169772)
Supplement: NIHMS575621-supplement-2.pdf [file NIHMS575621-supplement-2.pdf]

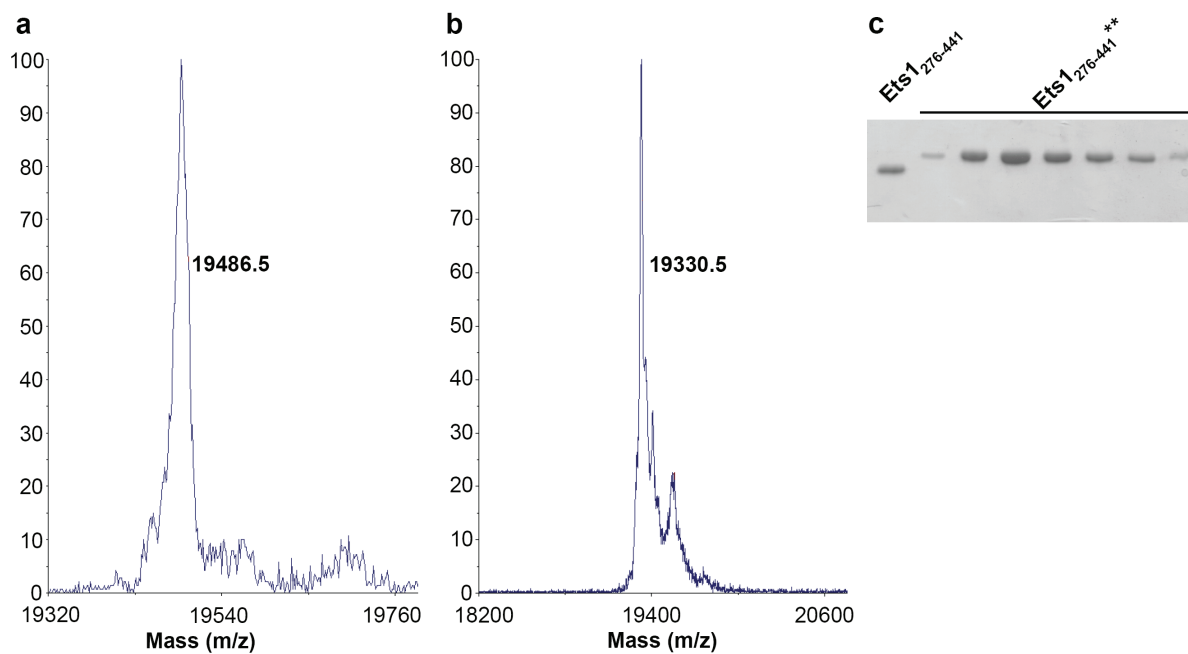

**Supplementary Figure 1. Characterization of Ets1<sub>276-441</sub> phosphorylation.** (a) and (b) MALDI spectra of phosphorylated Ets1<sub>276-441</sub>\*\* and non-phosphorylated Ets1<sub>276-441</sub>. The difference of molecular weights between Ets1<sub>276-441</sub>\*\* and Ets1<sub>276-441</sub> is 156 Da. This corresponds to two phosphates in Ets1<sub>276-441</sub>\*\* with molecular weight of 80 Da. (c) Coomassie blue-stained SDS PAGE of Ets1<sub>276-441</sub> and Ets1<sub>276-441</sub>\*\*. Lane 1 – purified Ets1<sub>276-441</sub>; lane 2 to 8 – purified fractions Ets1<sub>276-441</sub>\*\* from Mono Q<sup>TM</sup> 5/50 GL (GE Healthcare) column.

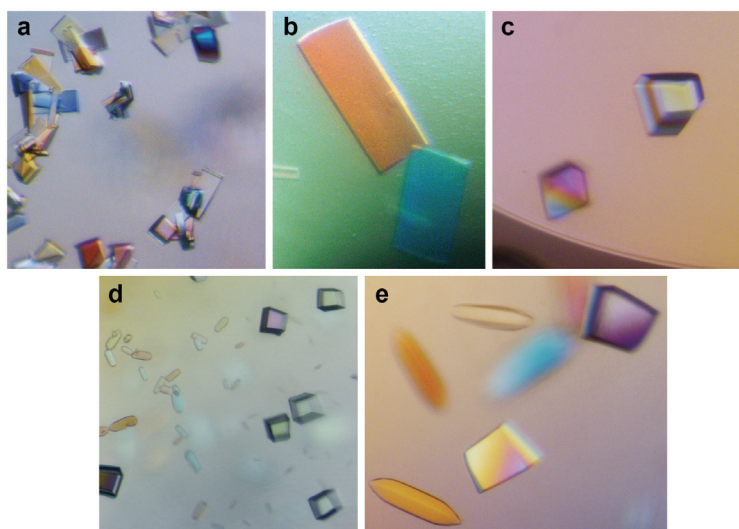

**Supplementary Figure 2. Photomicrographs of ternary complex crystals.** (a) The square-bipyramid and plate shaped crystals of Runx1<sub>1-242</sub>•Ets1<sub>296-441</sub>•TCR $\alpha$  obtained in an optimized growth condition. (b) and (c) The square-bipyramid and plate shaped crystals after macroseeding. (d) and (e) The deformed cube and rod shaped crystals of Runx1<sub>48-214</sub>•Ets1<sub>296-441</sub>•TCR $\alpha$  obtained in an optimized growth condition.

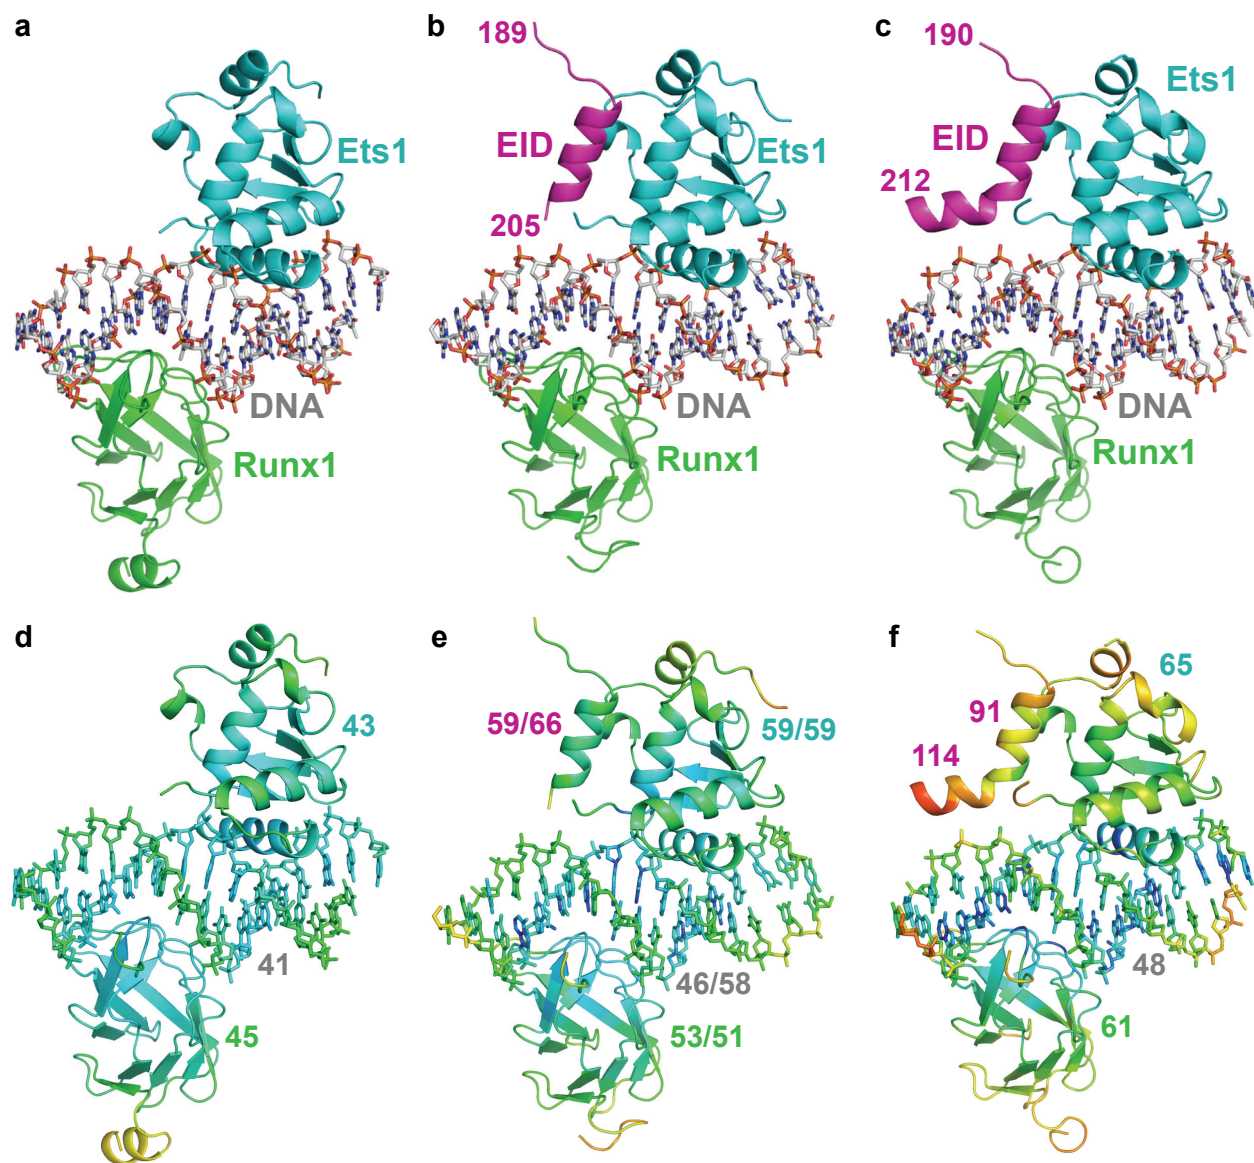

**Supplementary Figure 3. Side-by-side comparison of Runx1•Ets1•TCR $\alpha$  ternary complexes from three different crystal structures.** Overall folding of the complex from the structures of (a) plate shaped crystal of Runx1<sub>1-242</sub>•Ets1<sub>296-441</sub>•TCR $\alpha$ , (b) deformed cube shaped crystal of Runx1<sub>48-214</sub>•Ets1<sub>296-441</sub>•TCR $\alpha$ , and (c) square-bipyramid shaped crystal of Runx1<sub>1-242</sub>•Ets1<sub>296-441</sub>•TCR $\alpha$ . Runx1, Ets1 and EID are displayed in cartoons and DNA is displayed in sticks. Starting and ending residue numbers are indicated for the folded portions of Runx1 EID. The root-mean-square deviations (rmsd) between the structures in (a) and (b), (a) and (c), and (b) and (c), are 1.24 Å for 223 C $\alpha$  atoms, 1.27 Å for 212 C $\alpha$  atoms, and 0.35 Å for 236 C $\alpha$  atoms, respectively. Only one of two protomers in deformed cube shaped crystal is shown in panel (b). The rmsd between the protomers is 0.17Å for 244 C $\alpha$  atoms. Distribution of B-factors in the complexes from (d) plate shaped crystal of Runx1<sub>1-242</sub>•Ets1<sub>296-441</sub>•TCR $\alpha$ , (e) deformed cube shaped crystal of Runx1<sub>48-214</sub>•Ets1<sub>296-441</sub>•TCR $\alpha$ , and (f) square-bipyramid shaped crystal of Runx1<sub>1-242</sub>•Ets1<sub>296-441</sub>•TCR. The spectrum is changing from blue (the lowest B-factors) to green, yellow and red (the highest B-factor). Average B-values in Å<sup>2</sup> are shown for each subunit and separately for EID helices.

**Supplementary Figure 4.**  
**Quality of Runx1 EID electron density maps.** A stereoview of  $2F_o - F_c$  Fourier maps for the first and second ternary complex protomers in crystal structure of Runx1<sub>48-214</sub>•Ets1<sub>296-441</sub>•TCR $\alpha$  (**a** and **b**), and in crystal structure of Runx1<sub>1-242</sub>•Ets1<sub>296-441</sub>•TCR $\alpha$  (square-bipyramid form). (**c**) The maps are drawn at density level of  $1\sigma$  and show the density of EID residues and surrounding residues from Ets1 and DNA.

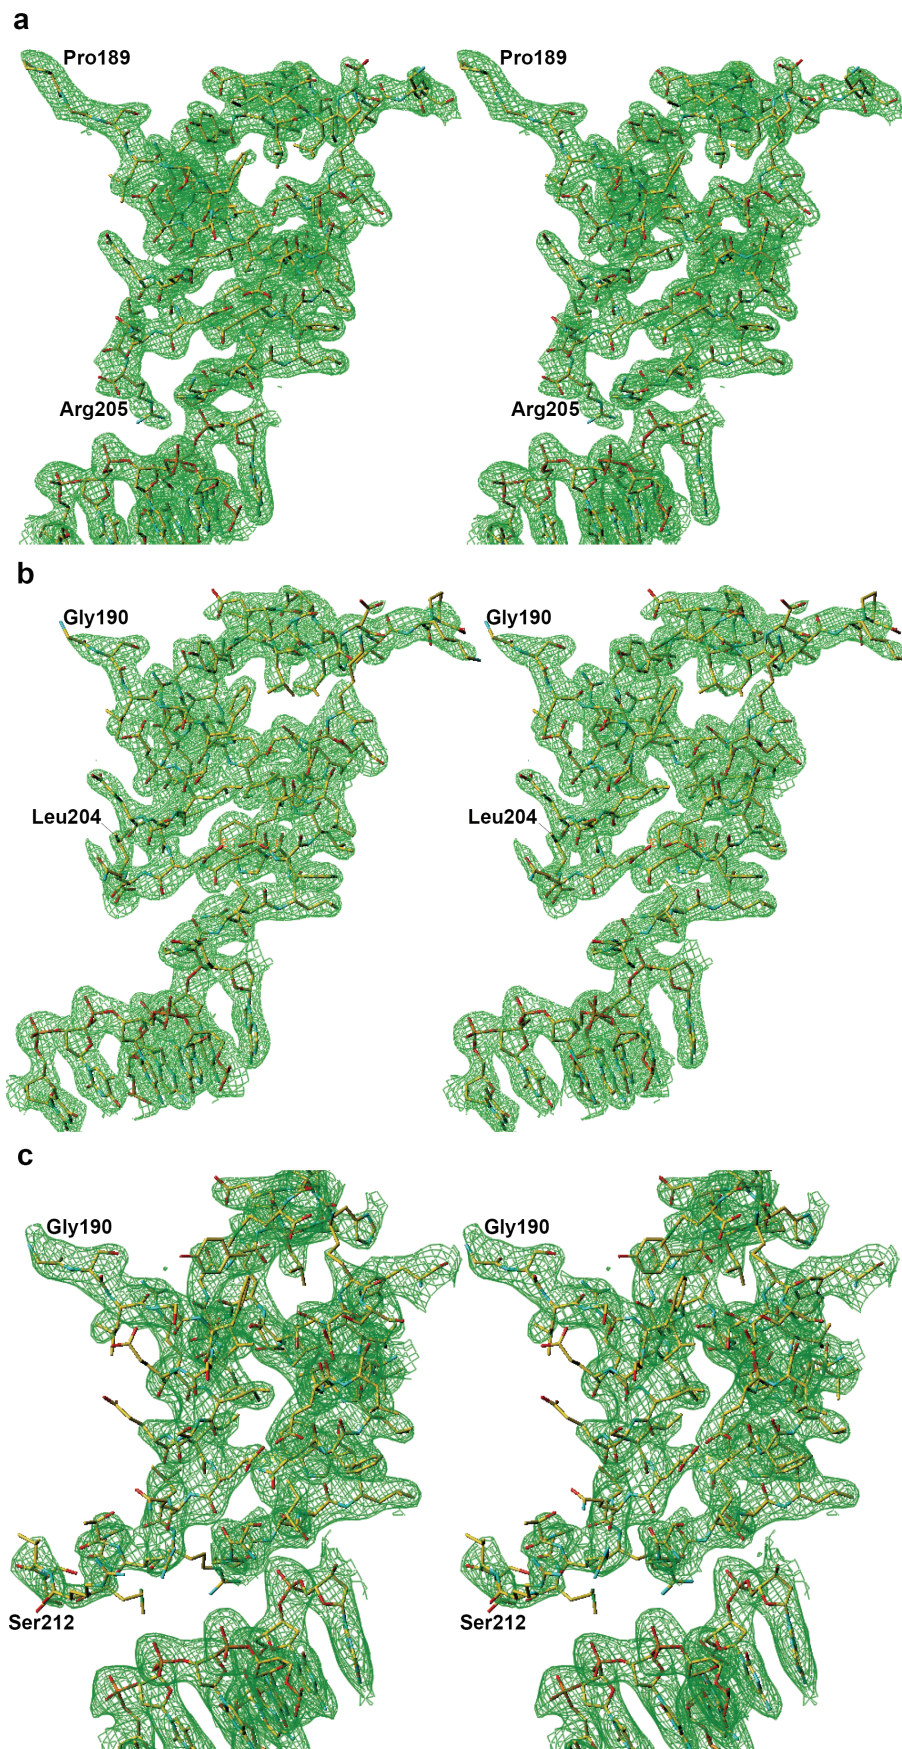

**Supplementary Figure 5. Crystal packing effects to the folding of Ets1 and EID.**

**(a)** Location of Ets1 C-terminal residues (1gvj) shown in palecyan after superimposition with Ets1 in square-bipyramid crystal. The comparison indicates that Pro68' and Asn69' from RD of symmetry-related molecule (RD') are in conflict with Ets1 C-terminal residues, resulting in their disorder.

**(b)** Comparison of square-bipyramid (ED is in cyan and EID is in magenta) and plate shaped crystal (ED in light grey and RD' is in dark grey) structures after superimposition of their EDs. The RD' in plate crystal shifts the C-terminal residues of ED to a conformation that is not favorable for the docking of EID.

**(c)** Comparison of square-bipyramid (EID is in magenta and RD' is in green) and deformed cube crystal (EID and RD' are in dark grey) structures after superimposition of their EIDs. The RD' in a deformed cube crystal is shifted relative to corresponding RD' in a square-bipyramid crystal towards the  $\alpha 2$  helix of EID. This prevents proper folding of  $\alpha 2$  helix of EID in a deformed cube crystal.

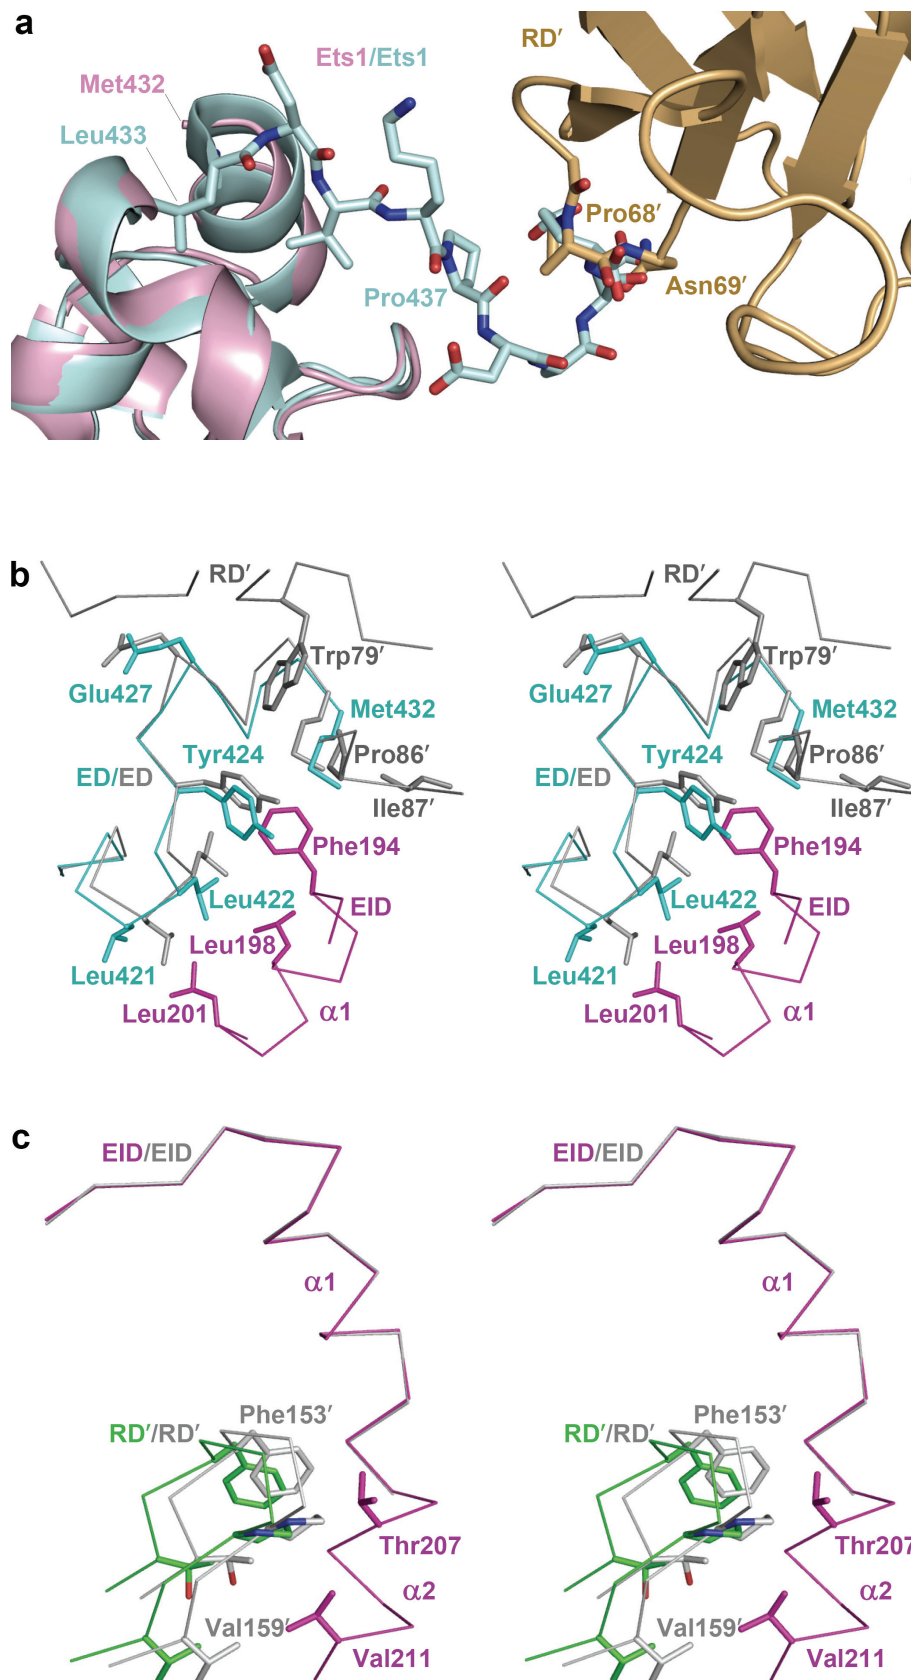

**Supplementary Figure 6. Potential hydrogen bonds of Runx1 Arg 205 side chain with TCR $\alpha$  DNA. The donor to acceptor distances are provided in Angstroms.**

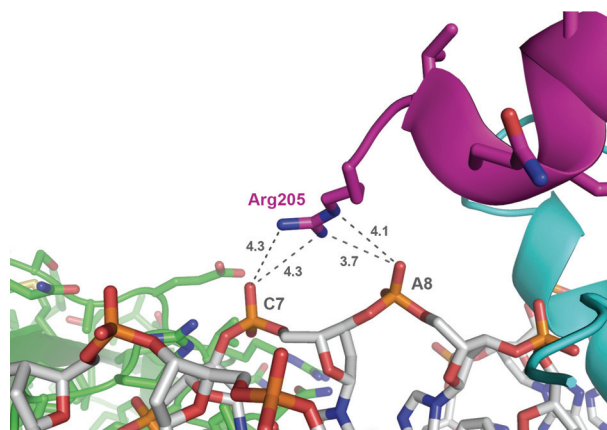

**Supplementary Figure 7. Comparison of Ets1 and Runx1 DNA-binding domains in Runx1<sub>1-242</sub>•Ets1<sub>296-441</sub>•TCR $\alpha$  complex with reported structures. (a) Comparison with RD (brown) in structure of Runx<sub>160-182</sub>•DNA (PDB code 1hjc). The rmsd between the RD's is 0.35 Å for 117 C $\alpha$  atoms. (b) Comparison with Ets domain (blue) in structure of (Ets1)<sub>2</sub>•2DNA (PDB code 3ri4). The rmsd between the ED's is 0.48 Å for 100 C $\alpha$  atoms.**

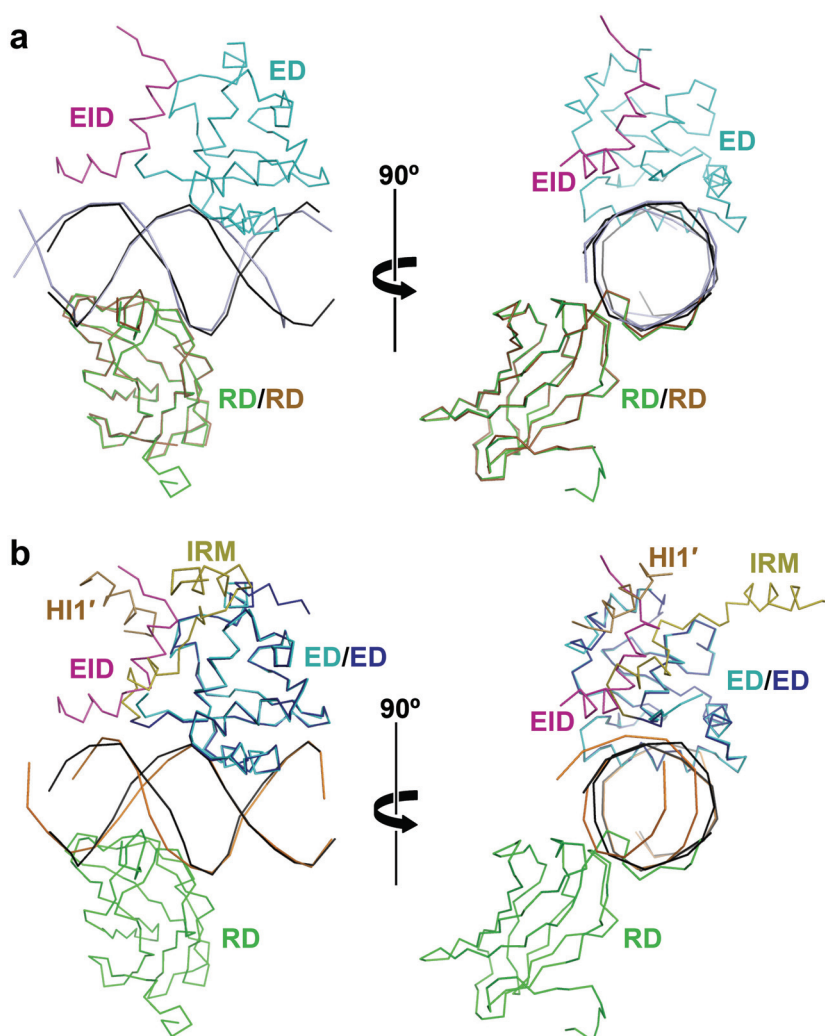

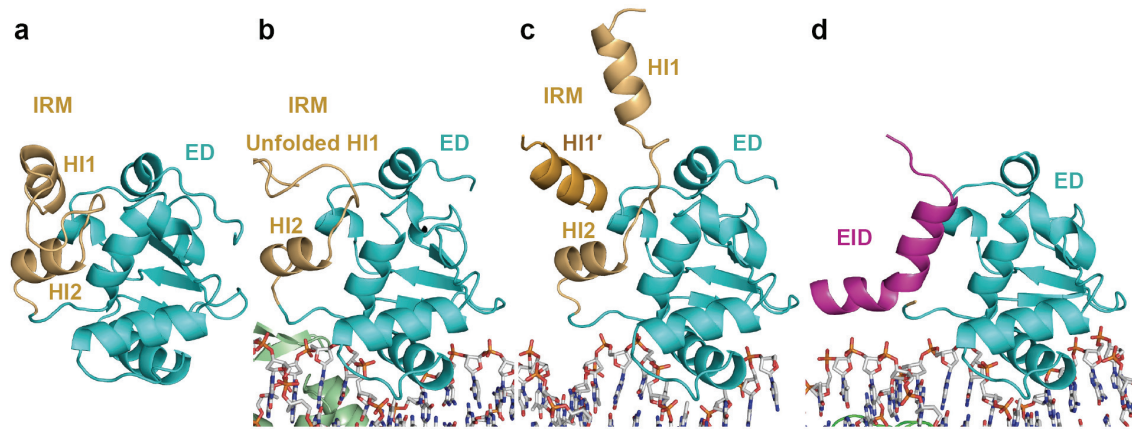

**Supplementary Figure 8. Comparison of DNA-free and DNA-bound Ets1 structures highlighting different pattern for Ets1 IRM folding.** (a) NMR structure of free Ets1 (PDB code 1R36). Both inhibitory helices HI1 and HI2 of IRM are folded in this structure. (b) Crystal structure of Ets1•Pax5•DNA ternary complex (1MDM) showing unfolding of HI1. HI2 remains folded in this complex. (c) Crystal structure of Ets1 dimer bound to *stromelysin-1* promoter DNA (3MFK). In this structure both HI1 and HI2 are folded. Symmetry related HI1 interacting with H4 is shown as HI1'. (d) Crystal structure of Runx1<sub>1-242</sub>•Ets1<sub>296-441</sub>•TCR $\alpha$  ternary complex. Entire IRM of Ets1 is disordered and replaced by EID of Runx1.

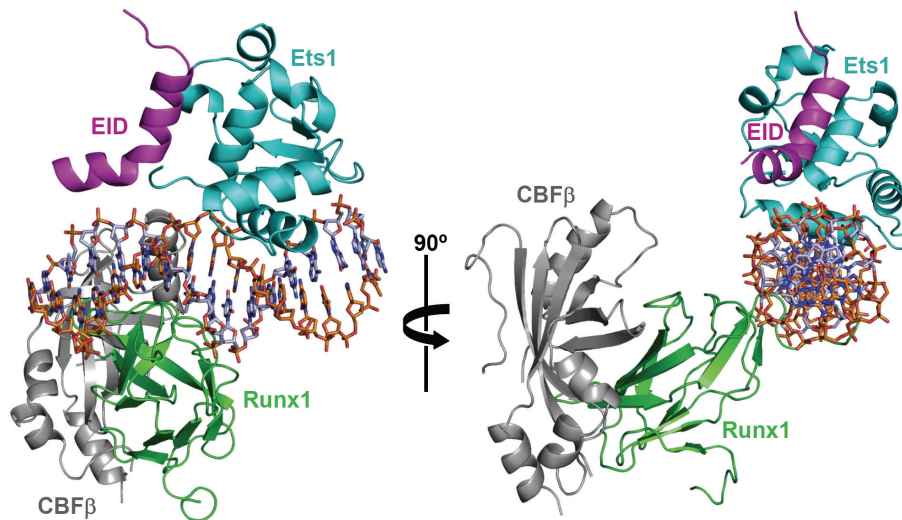

**Supplementary Figure 9. Model of Runx1<sub>1-242</sub>•Ets1<sub>296-441</sub>•CBF $\beta$ <sub>1-141</sub>•TCR $\alpha$  quaternary complex.** Modeling of CBF $\beta$ <sub>1-141</sub> was performed by rigid-body fitting of Runx1 subunit structure from Runx1•CBF $\beta$ •C/EBP $\beta$ •DNA complex (PDB access code 1I04) into the Runx1 subunit structure from Runx1<sub>1-242</sub>•Ets1<sub>296-441</sub>•TCR $\alpha$  complex. The model confirms the absence of CBF $\beta$ <sub>1-141</sub> physical intervention with EID•Ets1 interaction.
